# Supplementary material for: Concordance of acquired mutations between metastatic lesions and liquid biopsy in metastatic colorectal cancer
Source: Future Sci OA. 2021 Nov 5;7(10):FSO757. doi: 10.2144/fsoa-2021-0059 (PMC8609982; doi:10.2144/fsoa-2021-0059)
Supplement: Supplementary file 2 [file fsoa-07-757-s2.xlsx]

## Sheet: Sheet1
	Supplementary Table 2. RAS index of primary tumor, normal colonic mucosa, and metastatic lesions using the RASKET kit
	Gene		KRAS																														NRAS
	Exon		Exon 2													Exon 3										Exon 4							Exon 2													Exon 3
	Cut-off Value	300	1000	300	300	300	300	300	300	300	300	300	300	300	300	400	300	300	300	300	300	300	300	300	300	1400	300	300	400	300	300	300	2900	300	300	300	300	300	300	300	300	300	300	360	300	2000	300	300	300
	Sample	NC	K2PC	G12S	G12C	G12R	G12D	G12V	G12A	G13S	G13C	G13R	G13D	G13V	G13A	K3PC	A59T	A59G	Q61K	Q61E	Q61L	Q61P	Q61R	Q61Ht	Q61Hc	K117PC	K117Nc	K117Nt	K146PC	A146T	A146P	A146V	N2PC	G12S	G12C	G12R	G12D	G12V	G12A	G13S	G13C	G13R	G13D	G13V	G13A	N3PC	A59T	A59G	Q61K
Patient 1	Tb	66	5591	0	0	0	0	0	0	0	0	0	8	0	0	5795	0	0	0	0	0	0	0	0	0	5865	4	47	3784	0	0	112	5052	0	22	0	0	0	0	17	6	5	0	0	0	5004	0	0	0
	Ts	90	6453	0	0	0	0	0	0	0	0	0	0	0	0	6380	0	0	0	0	0	0	0	0	0	7248	0	0	4520	0	0	0	6118	0	9	0	0	10	0	0	0	0	0	0	0	5845	0	0	0
	N	72	6460	0	0	0	0	0	0	0	0	0	0	0	0	6710	0	0	0	0	0	0	0	0	0	7158	0	0	4274	0	0	0	6233	0	0	0	0	0	0	0	0	0	1	0	0	5990	0	0	1
	RL	73	5900	0	0	591	0	0	2126	0	0	0	32	0	0	5844	0	0	0	0	0	0	0	2909	0	6621	0	17	3361	0	0	47	5807	0	10	0	0	3	0	8	0	0	0	0	0	5271	0	0	0
	MS	78	5352	0	0	0	0	9141	21	0	0	10	52	0	0	6233	0	0	0	0	0	0	0	295	0	6617	0	0	3885	0	0	0	5512	0	13	0	10	15	5	0	0	0	0	0	0	5560	0	0	0
	S2	78	5951	0	0	49	0	0	0	0	0	0	8	0	0	6033	0	0	0	0	0	0	0	0	7470	7126	11	38	4344	0	3	5	5862	0	11	0	0	0	1	10	0	0	4	0	0	5528	0	0	0
	S3	79	6802	0	620	14735	0	0	0	0	0	0	0	0	0	6142	0	0	16	0	0	0	0	0	0	6729	0	5	4033	0	0	15	5559	0	12	5	0	6	0	3	0	7	0	0	0	5550	0	9	0
	HN	82	6278	0	91	0	0	0	0	0	0	0	1448	0	0	4895	0	4	0	5	0	1	0	0	0	7335	0	39	3612	0	0	56	5912	0	25	7	0	12	0	0	0	0	0	0	0	5158	0	0	14
	Lu	81	6860	0	4	0	0	0	0	0	0	0	0	0	0	5831	0	0	0	0	0	0	0	0	6844	8394	0	6	5568	0	0	0	7057	0	0	0	0	0	0	0	0	0	0	0	0	5490	0	3	0
	Kd	75	6867	0	114	0	0	0	0	0	0	0	0	0	0	6290	0	0	0	0	0	0	0	0	0	7865	0	0	4967	0	0	0	6438	1	0	0	0	0	0	0	0	0	0	0	0	5776	0	0	0
Patient 2	T	26	4423	0	4	0	10	0	0	0	0	0	0	5	0	3390	39	3	11	24	2	14	50	10	21	5223	2	0	5396	0	0	0	5063	0	0	0	0	0	0	0	0	0	0	0	3	4402	0	8	0
	Liver metastasis	15	4445	0	0	0	0	0	0	0	0	0	3	5	0	3396	28	0	5	5	11	0	28	7	9	5066	1	0	5256	0	0	0	5186	0	0	0	0	0	0	0	0	0	3	0	2	4433	0	0	0
Patient 3	T	20	4491	3	0	0	20	0	0	16	2	0	0	0	2	3299	15	5	0	7	0	11	0	7	0	5358	0	0	4985	0	0	0	5231	10	0	5	6	0	0	5	0	0	6	0	2	4192	4	8	7
	Liver metastasis	14	4251	6	18	3	16	0	9	0	5	0	0	0	0	3260	3	2	0	0	4	1	0	0	12	5089	0	0	4674	0	0	0	5051	14	4	0	0	0	0	0	0	0	0	4	5	4173	0	9	10
Patient 4	T	14	4545	5	0	0	2	0	0	3	0	0	0	0	0	3427	52	0	10	12	9	12	11	20	8	5348	0	0	5626	0	0	0	5251	0	0	3	0	0	0	1	0	0	0	0	0	4228	0	9	2
	Peritoneal dissemination	26	4505	15	0	0	16	0	2	3	0	0	0	4	0	3347	0	0	8	5	12	14	0	8	0	5477	5	0	5285	0	0	0	5341	11	0	0	0	0	0	0	0	0	0	0	0	4394	0	3	6
	Tb denotes primary tumor tissue obtained before treatment by biopsy. Ts denotes primary tumor tissues obtained from surgical resection after initial chemotherapy. N denotes normal colonic mucosa obtained from surgical resection after initial chemotherapy.
	K2PC, K3PC, K117PC, K146PC, N2PC, N3PC, N117PC, and N146PC denote control of amplified wild-type allele of KRAS exon 2, KRAS exon 3, KRAS exon 4 including codon 117, KRAS exon 4 including codon 146, NRAS exon 2, NRAS exon 3, NRAS exon 4 including codon 117, and NRAS exon 4 including codon 146, respectively.
[truncated: 15 more columns]
