# Supplementary material for: Concordance of acquired mutations between metastatic lesions and liquid biopsy in metastatic colorectal cancer
Source: Future Sci OA. 2021 Nov 5;7(10):FSO757. doi: 10.2144/fsoa-2021-0059 (PMC8609982; doi:10.2144/fsoa-2021-0059)
Supplement: Supplementary file 3 [file fsoa-07-757-s3.xlsx]

## Sheet: Sheet2
Supplementary Table 3. Liquid Biopsy Results of the RASKET kit
Gene		KRAS																														NRAS
Exon		Exon 2													Exon 3										Exon 4							Exon 2													Exon 3
Cut-off Value	300	1000	300	300	300	300	300	300	300	300	300	300	300	300	400	300	300	300	300	300	300	300	300	300	1400	300	300	400	300	300	300	2900	300	300	300	300	300	300	300	300	300	300	360	300	2000	300	300	300	300
Sample	NC	K2PC	G12S	G12C	G12R	G12D	G12V	G12A	G13S	G13C	G13R	G13D	G13V	G13A	K3PC	A59T	A59G	Q61K	Q61E	Q61L	Q61P	Q61R	Q61Ht	Q61Hc	K117PC	K117Nc	K117Nt	K146PC	A146T	A146P	A146V	N2PC	G12S	G12C	G12R	G12D	G12V	G12A	G13S	G13C	G13R	G13D	G13V	G13A	N3PC	A59T	A59G	Q61K	Q61E
Patient 1-Point 1	81	2199	1	7	13	40	0	22	17	0	29	4	33	34	1082	16	50	35	58	29	31	27	23	27	2380	38	0	732	38	44	65	4243	11	18	12	0	0	16	12	10	4	1	0	0	3569	0	8	11	0
Patient 1-Point 2	70	4553	10	1	10	0	0	15	0	0	22	0	20	24	2599	0	41	28	33	22	20	36	16	0	4780	34	0	1832	39	26	102	5205	14	18	8	2	26	14	4	9	24	7	0	15	4135	0	19	12	40
Patient 1-Point 3	68	3944	11	9	2600	136	0	3	0	0	19	159	31	32	1953	5	13	38	61	42	43	27	30	471	3943	10	0	1205	31	41	132	4489	20	28	20	20	34	21	25	49	39	34	12	23	2863	11	39	38	25
Patient 2-Point 1	38	4292	0	0	0	0	0	0	0	0	0	0	0	0	3305	0	0	0	0	0	0	0	0	0	7023	0	0	2263	0	0	0	5509	0	0	0	0	0	0	0	22	0	0	0	0	3695	7	0	0	0
Patient 2-Point 2	26	4535	0	0	0	0	0	0	0	0	0	0	0	0	3760	0	0	0	0	0	0	0	0	0	6518	0	0	2716	0	0	0	5311	0	0	0	0	0	0	0	18	0	0	0	0	3705	13	0	0	0
Patient 2-Point 3	18	3367	0	0	0	0	0	0	0	0	0	0	0	0	2610	0	0	0	0	0	0	0	0	0	5274	0	20	1734	0	0	0	4397	0	0	0	0	2	7	0	23	0	4	0	2	2683	27	0	0	0
Patient 3-Point 1	48	4880	0	0	0	0	0	0	0	0	0	0	4	0	4283	0	0	0	0	0	0	0	0	0	6710	3	0	3472	0	0	0	5425	0	26	2	4	0	1	0	21	1	0	17	0	3750	0	6	0	0
Patient 3-Point 2	32	4673	0	0	0	0	0	0	0	0	0	0	10	0	4261	0	0	0	0	0	0	0	0	0	6527	0	0	3157	0	0	0	5489	0	4	0	1	0	0	0	19	0	0	0	0	3831	0	0	0	0
Patient 3-Point 3	37	4437	0	0	0	0	0	0	0	0	0	0	0	0	3498	0	0	0	0	0	0	0	0	0	6780	0	0	3065	0	0	0	5318	0	0	1	0	4	8	0	28	0	0	0	3	3461	6	0	0	0
Patient 4-Point 1	38	4477	0	0	0	0	0	0	0	0	0	0	0	0	3476	0	0	0	0	0	0	0	0	0	6848	0	0	2525	0	0	0	5651	0	0	0	0	0	0	0	16	0	0	0	0	3726	0	0	0	0
Patient 4-Point 2	22	4861	0	0	0	0	0	0	0	0	0	0	0	0	3860	0	0	0	0	0	0	0	0	0	6972	0	0	2838	0	0	0	5744	0	0	1	0	0	0	0	0	0	0	0	0	3851	0	0	0	0
Patient 4-Point 3	32	4742	0	0	0	0	0	0	0	0	0	0	0	0	3801	0	6	0	0	0	0	0	0	0	6550	0	0	2919	0	0	0	5537	0	8	5	0	0	5	0	5	0	0	0	0	3590	0	1	0	0
NE denotes not evaluated.
NRAS codon 146 indexes of Patient 1-Point 3 sample were characterized as "not recovered" because PCR control of N117PC and N146PC beads were less than the cut-off value.
[truncated: 14 more columns]
